# Supplementary material
Source: bioRxiv or medRxiv preprint supplement (https://www.biorxiv.org/highwire/filestream/98757/field_highwire_adjunct_files/1/298943-2.pdf)
Supplement: Supplementary file [file 298943-2.pdf]

**A**

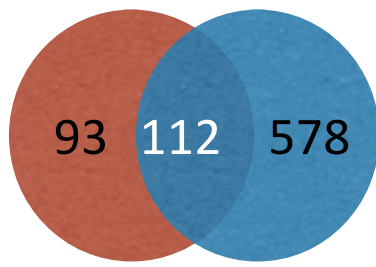

Yeast

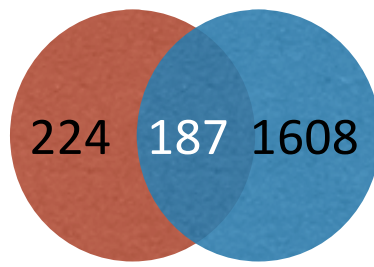

Human

**B**

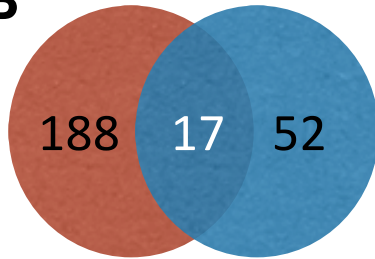

Yeast

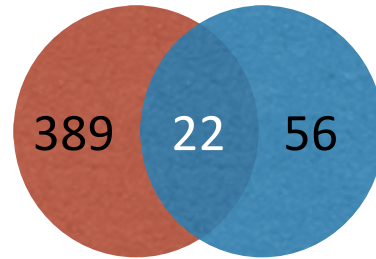

Human

# Human

protein-protein

protein-RNA

# Yeast

protein-protein

protein-RNA

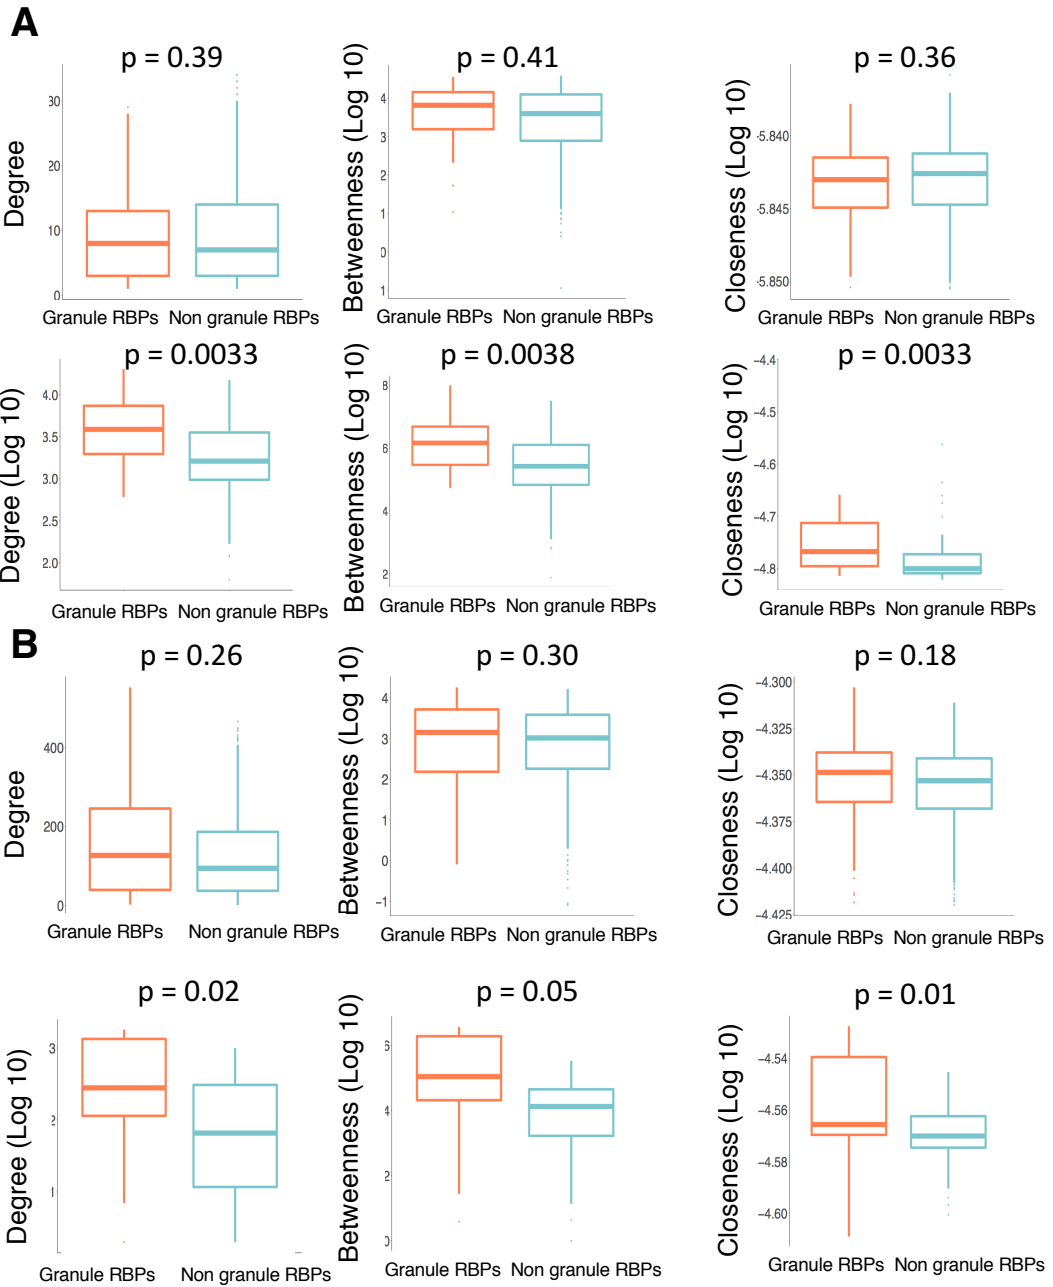

Supplementary Figure 2

**A (Q1)**

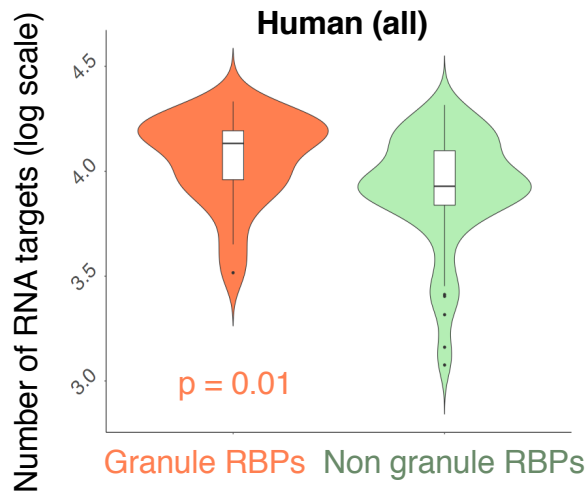

**B (Q2)**

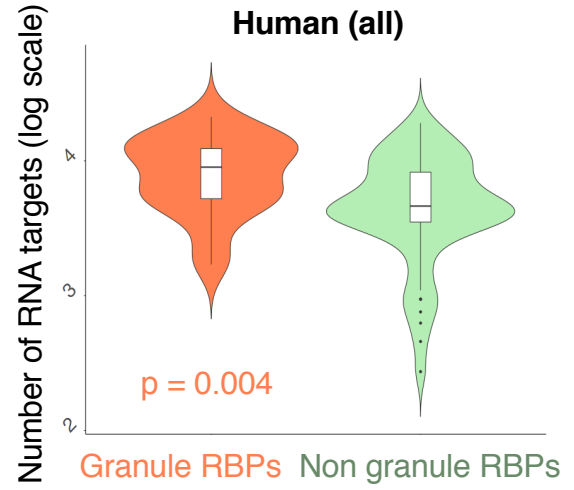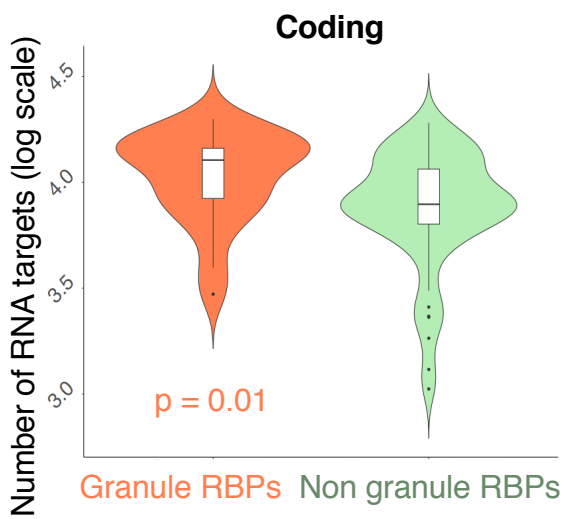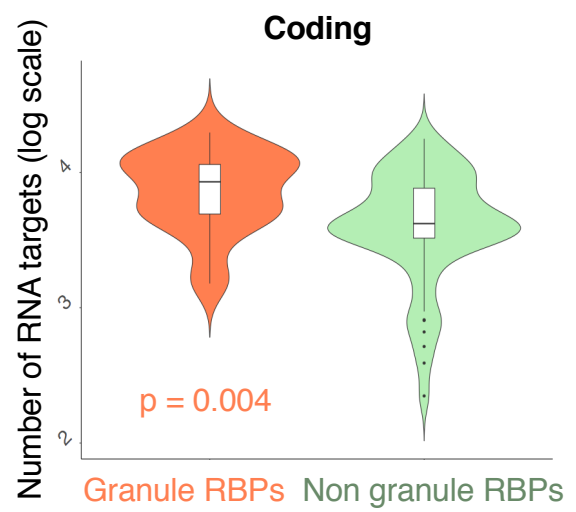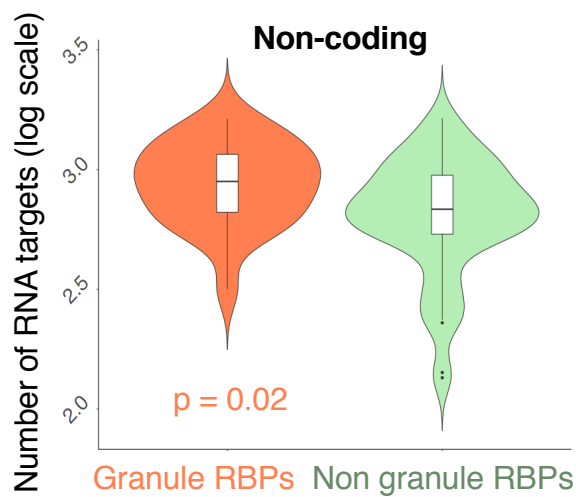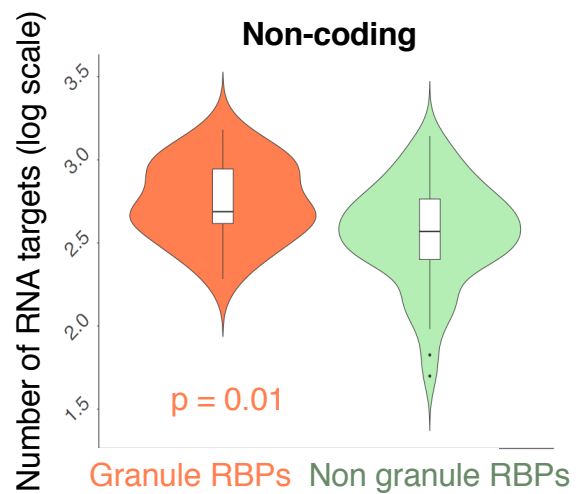

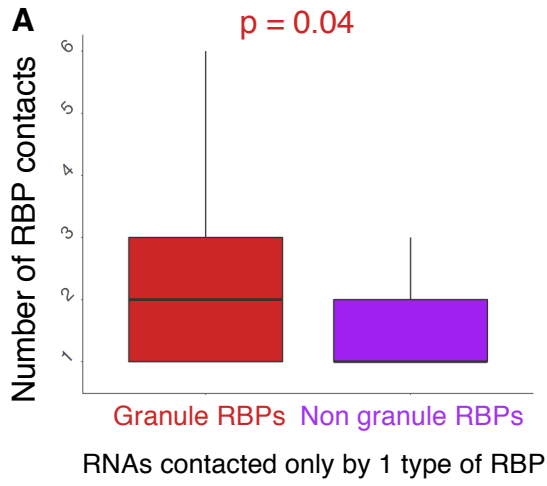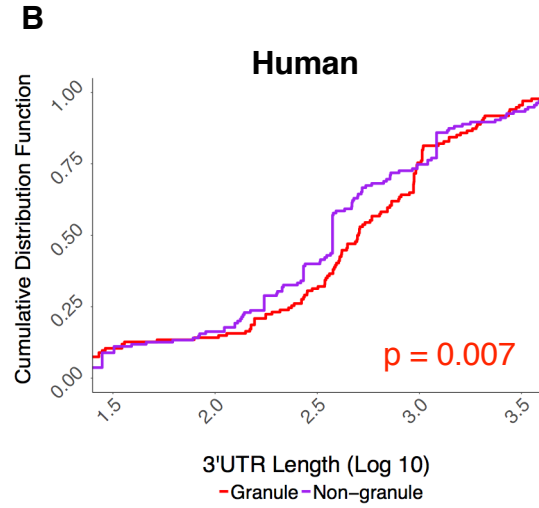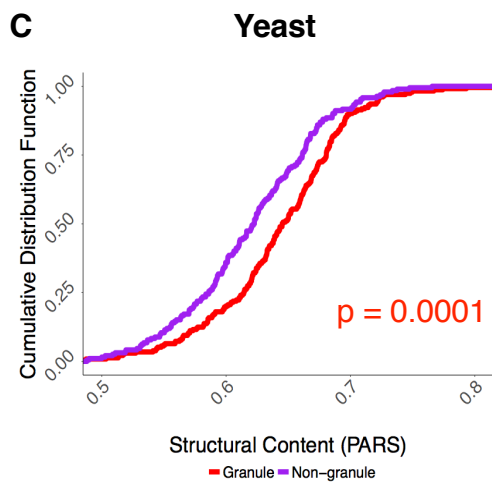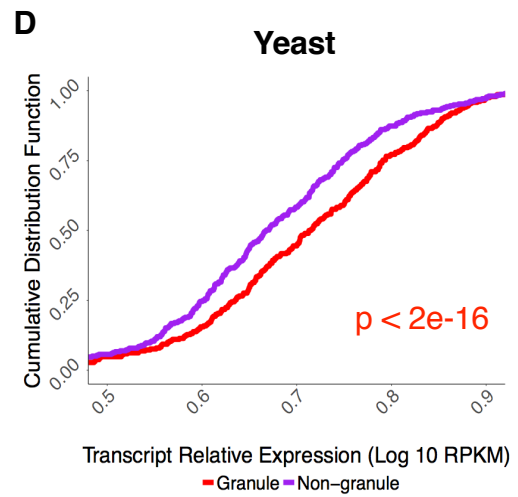

**A**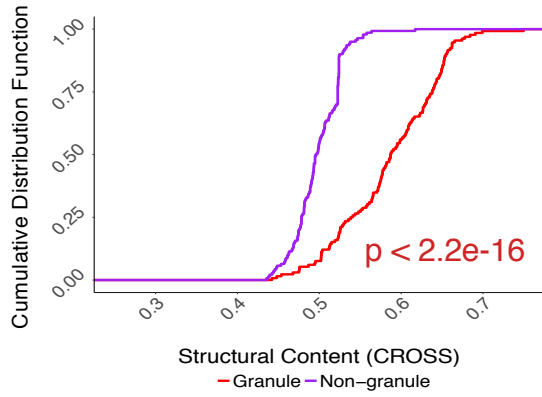**B**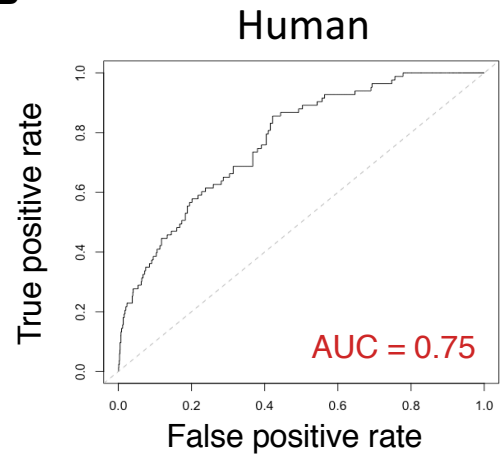**C**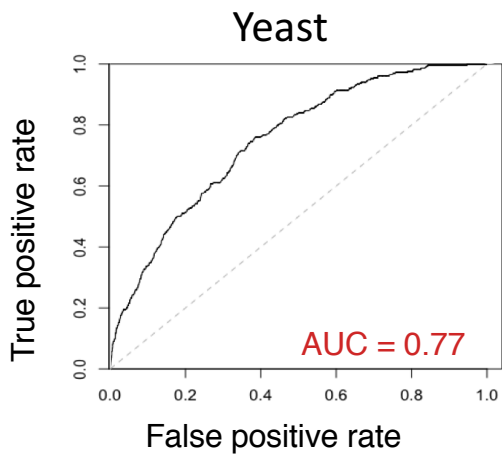**D**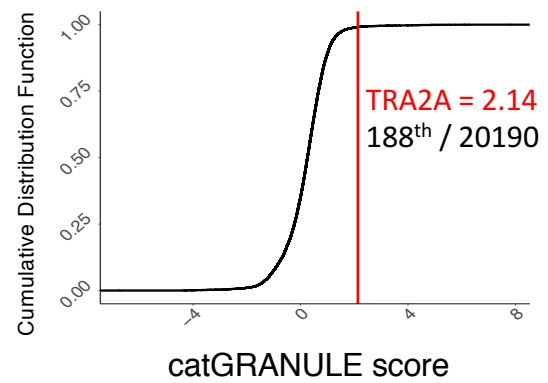

**A**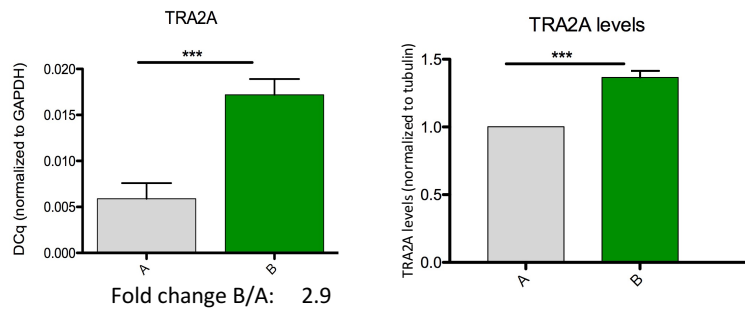**B**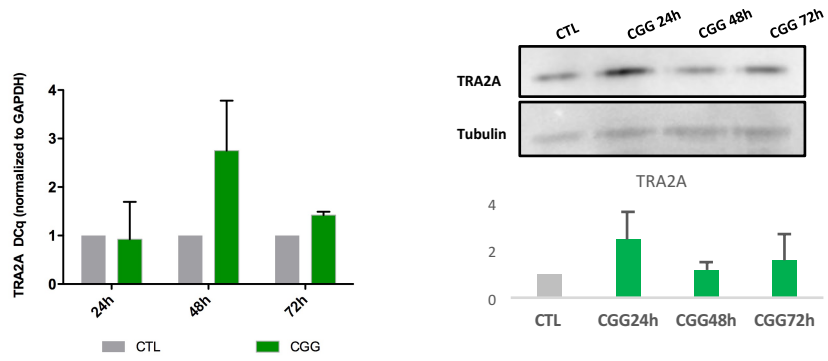

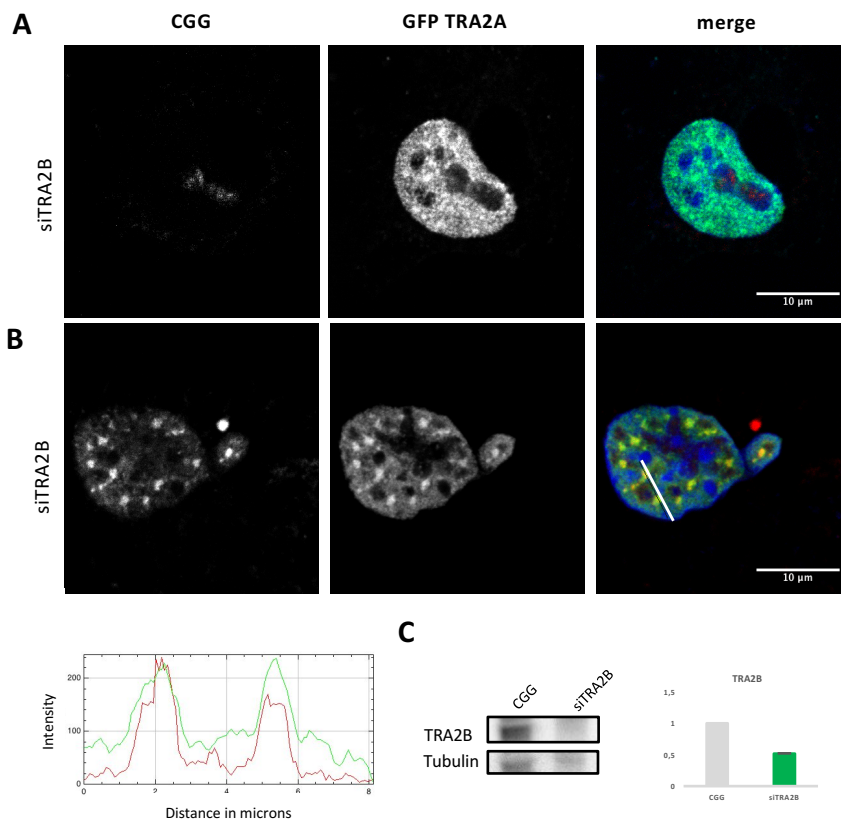

Supplementary Figure 7

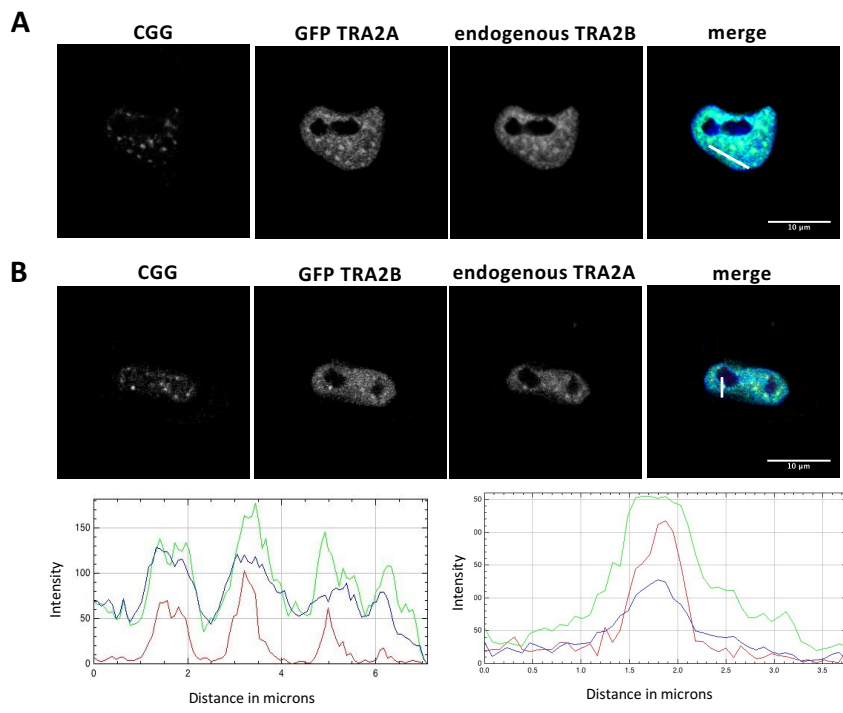

Supplementary Figure 8



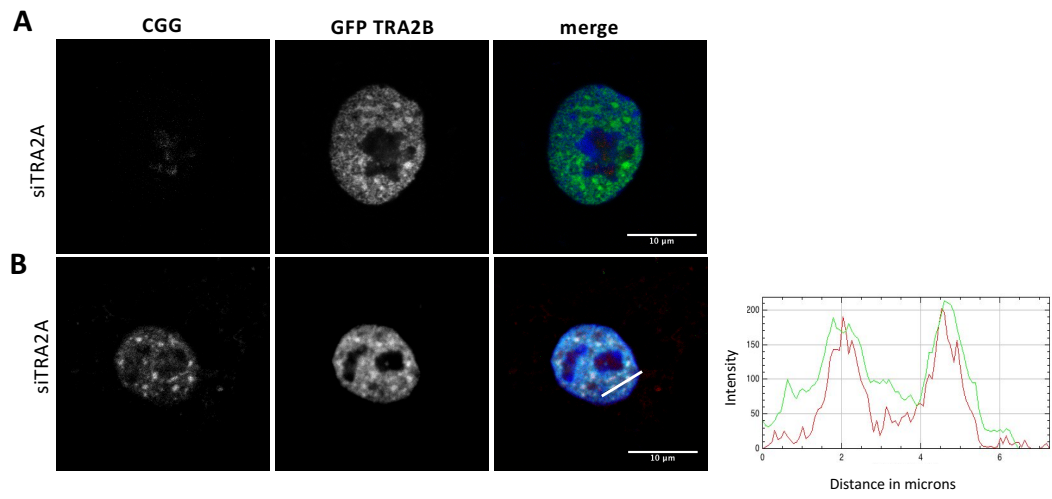

Supplementary Figure 9
